# Supplementary material
Source: PubMed Central journal article supplement (PMC150712)

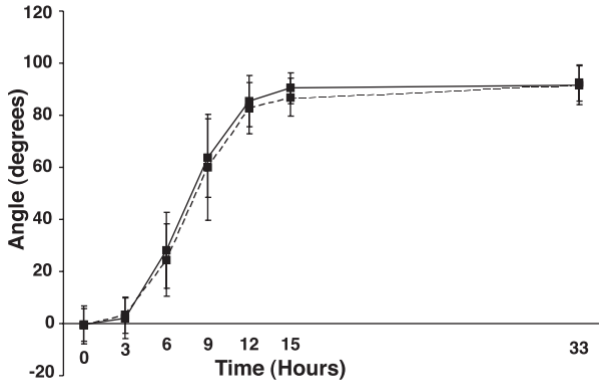

Supplement: plntcell_14_7_1635__1.pdf [file plntcell_14_7_1635__1.pdf]
